# Supplementary material
Source: PubMed Central journal article supplement (PMC9548104)
Supplement: 13063_2022_6791_MOESM2_ESM.pdf [file 13063_2022_6791_MOESM2_ESM.pdf]

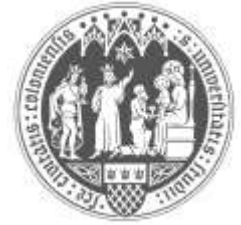

Geschäftsstelle Ethikkommission • Universität zu Köln • 50931 Köln

Uniklinik Köln, Klinik und Poliklinik für Innere  
Medizin I  
Herrn Prof. Dr. Oliver Cornely  
Kerpener Str. 62  
50937 Köln

Per EKPool

Nachrichtlich per E-Mail:  
Paul-Ehrlich-Institut  
Bundesinstitut für Impfstoffe und biomedizinische  
Arzneimittel  
Paul-Ehrlich-Straße 51-59  
D- 63225 Langen

Unser Zeichen: 21-1457\_1-AMG-ff  
EudraCT-Nr.: 2021-004526-29  
Protokoll-Nr.: uni-koeln-4602  
Sponsor: Universität zu Köln, Albertus-  
Magnus Platz, 50923 Köln  
Mit der Uniklinik Köln, Klinik und Poliklinik  
Antragsstellung für Innere Medizin I  
beauftragt:  
Herrn Prof. Dr. Oliver Cornely  
Kerpener Str. 62  
50937 Köln

A multinational, phase 2, randomised, adaptive protocol to evaluate immunogenicity and reactogenicity of different COVID-19 vaccines administration in older adults ( $\geq 75$ ) already vaccinated against SARS-COV-2

Sehr geehrter Herr Professor Cornely,

hiermit bestätigen wir, dass die u. g. Unterlagen am 27.09.2021 eingegangen sind.

Die in unserem Schreiben vom 10.09.2021 genannten **Bedingungen sind eingetreten**, sodass nunmehr **keine ethischen oder rechtlichen Bedenken** gegen die Durchführung des Vorhabens bestehen. Hierzu wünschen wir Ihnen viel Erfolg.

Köln, 28.09.2021

**Medizinische Fakultät  
der Universität zu Köln**

**Geschäftsstelle der  
Ethikkommission**

Vorsitzender  
Univ.-Prof. Dr. med.  
Raymond Voltz

Leitung der Geschäftsstelle  
Dr. med. Guido Grass  
Telefon +49 221 478 87916

Stellv. Leitung  
Dipl.-Ges.-Ök. Karolina Mäder  
Telefon +49 221 478 88844

Dipl.-Biol. Alice Follmann  
Telefon +49 221 478 97773

Dipl.-Ges.-Ök. Christine Grimm  
Telefon +49 221 478 97772

Dipl.-Ges.-Ök. Agnieszka  
Hompanera Torre  
Telefon +49 221 478 87488

Christin Willgrod M.A.  
Telefon +49 221 478 82902

Büroleitung  
Barbara Ulhardt M.A.  
Telefon +49 221 478 82900  
Telefax +49 221 478 82905

ek-med@uni-koeln.de  
www.ek-koeln.de

**Servicezeiten:**

Mo. – Do. 9.00 – 16.00 Uhr  
Fr. 9.00 – 12.00 Uhr  
und nach Vereinbarung

**Besucheradresse:**

Robert-Koch-Str. 10  
Gebäude 55, 2. Etage  
50931 Köln

Postanschrift:  
Gebäude 55, Kerpener Str. 62  
50937 Köln

**Bankverbindung:**

Bank für Sozialwirtschaft Köln  
BLZ 370 205 00  
Kto.-Nr. 8 150 000  
BIC BFSWDE31

Mit freundlichen Grüßen



im Auftrag  
Dr. Guido Grass

### Liste der eingereichten Unterlagen

- 1) 2021-004526-29 DE 20210915 CTA.xml vom 27.09.2021
- 2) EU-COVAT-1\_Aged\_DEU\_ICF\_German\_001\_V02\_0.pdf vom 27.09.2021
- 3) EU-COVAT-1\_Aged\_DEU\_ICF\_German\_001\_V02\_0\_TrackChange.pdf vom 27.09.2021
- 4) EU-COVAT-1\_Aged\_EC-eku-k\_2021-09-27\_Ini\_Con-Appr\_Resp.pdf vom 27.09.2021
- 5) EU-COVAT-1\_Aged\_EC-eku-k\_2021-09-27\_Ini\_Con-Appr\_Resp.pdf vom 27.09.2021
- 6) EU-COVAT-1\_AGED\_Modul 1\_EC\_2021-09-15\_sign.pdf vom 27.09.2021
- 7) EU-COVAT-1\_Aged\_Sub-PROTOCOL\_V02\_0\_sign.pdf vom 27.09.2021
- 8) EU-COVAT-1\_Aged\_Sub-PROTOCOL\_V02\_0\_TrackChange.pdf vom 27.09.2021
- 9) EU-COVAT\_Master protocol\_V02\_0.pdf vom 27.09.2021
- 10) EU-COVAT\_Master protocol\_V02\_0\_TrackChange.pdf vom 27.09.2021
